# Supplementary material for: Smart covalent organic networks (CONs) with “on-off-on” light-switchable pores for molecular separation
Source: PubMed Central journal article supplement — Sci Adv. 2020 Aug 19;6(34):eabb3188. doi: 10.1126/sciadv.abb3188 (PMC7438094; doi:10.1126/sciadv.abb3188), 2020-08-19
Supplement: abb3188_SM.pdf [file abb3188_SM.pdf]

## Supplementary Materials for

### **Smart covalent organic networks (CONs) with “on-off-on” light-switchable pores for molecular separation**

Jiangtao Liu, Shaofei Wang, Tiefan Huang, Priyanka Manchanda, Edy Abou-Hamad, Suzana P. Nunes\*

\*Corresponding author. Email: [suzana.nunes@kaust.edu.sa](mailto:suzana.nunes@kaust.edu.sa)

Published 19 August 2020, *Sci. Adv.* **6**, eabb3188 (2020)

DOI: 10.1126/sciadv.abb3188

#### **The PDF file includes:**

Figs. S1 to S10  
Tables S1 to S4  
Legends for movies S1 to S5  
References

#### **Other Supplementary Material for this manuscript includes the following:**

(available at [advances.sciencemag.org/cgi/content/full/6/34/eabb3188/DC1](https://advances.sciencemag.org/cgi/content/full/6/34/eabb3188/DC1))

Movies S1 to S5

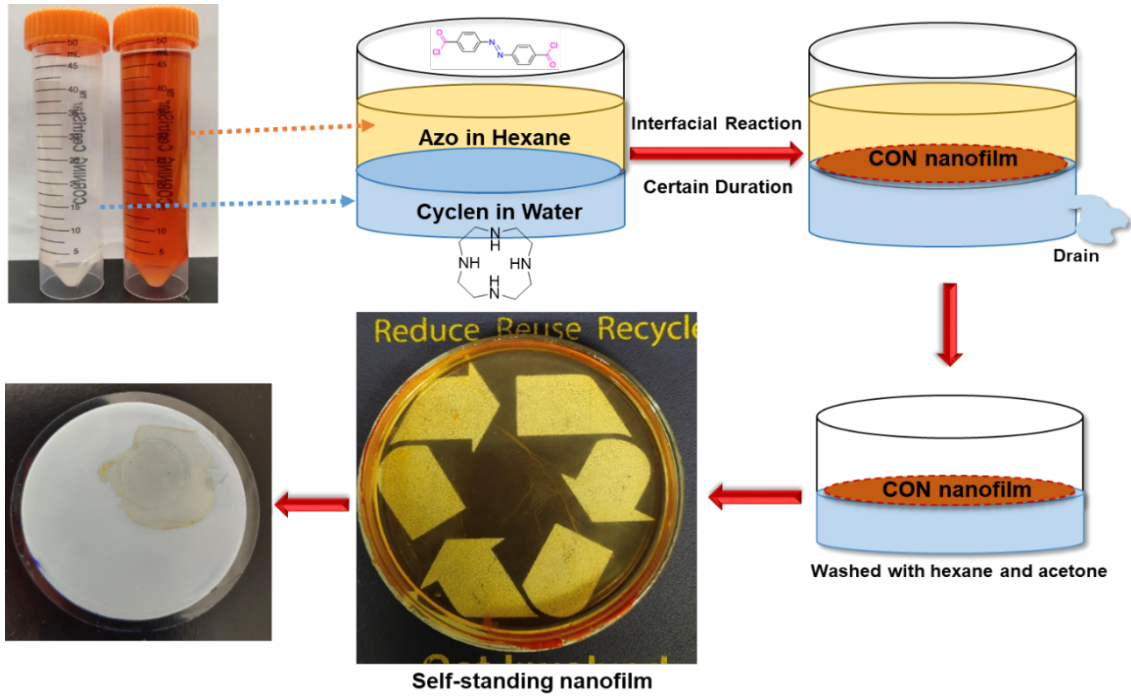

| System 1 | 1,4,7,10-Tetraazacyclododecane   | Azobenzene-4,4'-dicarbonyl Dichloride | SDS (mmol/l) | Membranes                           | Note |  |
|----------|----------------------------------|---------------------------------------|--------------|-------------------------------------|------|--|
| 1-1      | 0.5 mmol/100 mL H <sub>2</sub> O | 0.2 mmol/100 mL Hexane                | 0            | Thin, defect, low mechanical robust | ×    |  |
| 1-2      | 1.0 mmol/100 mL H <sub>2</sub> O | 0.2 mmol/100 mL Hexane                | 0            | Thin, defect, low mechanical robust | ×    |  |
| 1-3      | 1.5 mmol/100 mL H <sub>2</sub> O | 0.2 mmol/100 mL Hexane                | 0            | Thin, defect, low mechanical robust | ×    |  |
| 1-4      | 0.5 mmol/100 mL H <sub>2</sub> O | 0.2 mmol/100 mL Hexane                | 0.1          | Thin, porous, defect                | ×    |  |
| 1-5      | 0.5 mmol/100 mL H <sub>2</sub> O | 0.2 mmol/100 mL Hexane                | 0.5          | Thick, porous, defect               | ×    |  |
| 1-6      | 0.5 mmol/100 mL H <sub>2</sub> O | 0.2 mmol/100 mL Hexane                | 1.0          | Thick, porous, defect               | ×    |  |

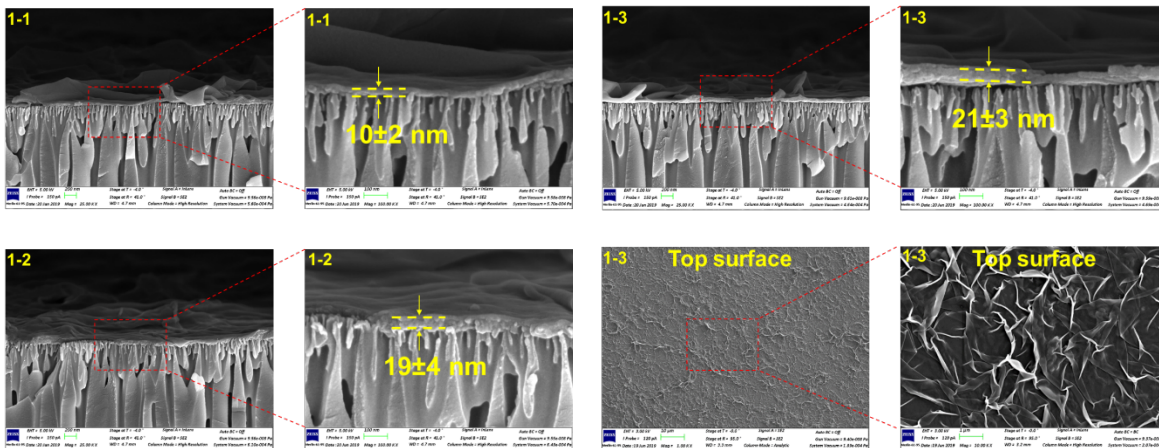

**Fig. S1. Fabrication process, reaction conditions, and results of the freestanding CON films via water and hexane system. Photo credits: Jiangtao Liu.**

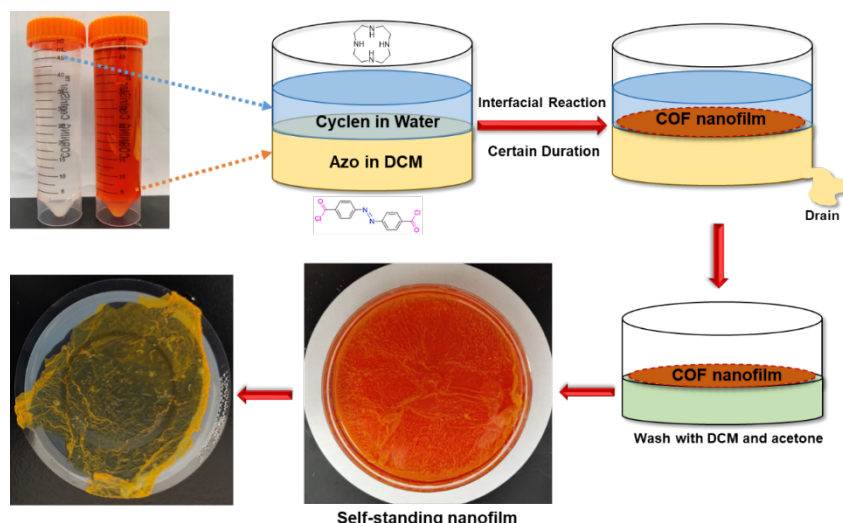

| System 2 | 1,4,7,10-Tetraazacyclododecane   | Azobenzene-4,4'-dicarbonyl Dichloride | SDS (mmol) | K <sub>2</sub> CO <sub>3</sub> (mmol) | Membranes             | Note |
|----------|----------------------------------|---------------------------------------|------------|---------------------------------------|-----------------------|------|
| 2-1      | 0.5 mmol/100 mL H <sub>2</sub> O | 0.5 mmol / 100 mL DCM                 | 0          | 0                                     | Thin, defect          | ×    |
| 2-2      | 0.5 mmol/100 mL H <sub>2</sub> O | 1.0 mmol / 100 mL DCM                 | 0          | 0                                     | Thick, porous, defect | ×    |
| 2-3      | 1.0 mmol/100 mL H <sub>2</sub> O | 1.0 mmol / 100 mL DCM                 | 0          | 0                                     | Thick, porous, defect | ×    |
| 2-4      | 1.5 mmol/100 mL H <sub>2</sub> O | 1.0 mmol / 100 mL DCM                 | 0          | 0                                     | Thick, defect         | ×    |
| 2-5      | 0.5 mmol/100 mL H <sub>2</sub> O | 1.0 mmol / 100 mL DCM                 | 0.1        | 0                                     | Thick, porous, defect | ×    |
| 2-6      | 0.5 mmol/100 mL H <sub>2</sub> O | 1.0 mmol / 100 mL DCM                 | 1.0        | 0                                     | Thick, porous, defect | ×    |
| 2-7      | 1.0 mmol/100 mL H <sub>2</sub> O | 0.5 mmol / 100 mL DCM                 | 0          | 0.1                                   | Thick, gel, defect    | ×    |
| 2-8      | 1.5 mmol/100 mL H <sub>2</sub> O | 1.0 mmol / 100 mL DCM                 | 0          | 0.2                                   | Thick, gel, defect    | ×    |

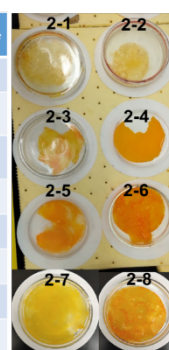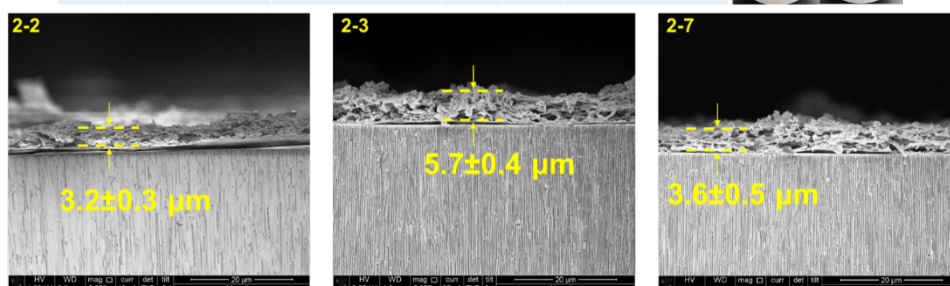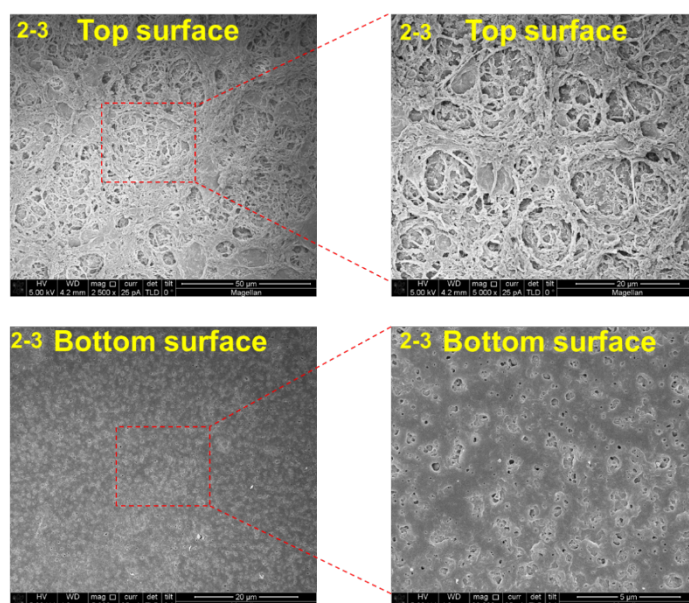

**Fig. S2. Fabrication process, reaction conditions, and results of the freestanding CON films via water and dichloromethane system.** Photo credits: Jiangtao Liu.

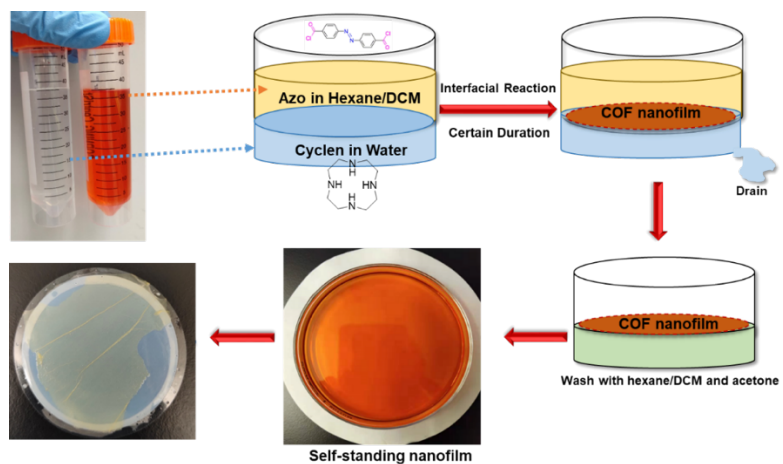

| System 3 | 1,4,7,10-Tetraazacyclododecane   | Azobenzene-4,4'-dicarbonyl Dichloride | Reaction time (h) | Membranes          | Note |
|----------|----------------------------------|---------------------------------------|-------------------|--------------------|------|
| 3-1      | 0.5 mmol/100 mL H <sub>2</sub> O | 0.2 mmol / 100 mL Hexane/DCM          | 24                | Thin, defect       | ✗    |
| 3-2      | 0.5 mmol/100 mL H <sub>2</sub> O | 0.5 mmol / 100 mL Hexane/DCM          | 24                | Thin, defect free  | ✓    |
| 3-3      | 1.0 mmol/100 mL H <sub>2</sub> O | 0.5 mmol / 100 mL Hexane/DCM          | 24                | Thick, defect free | ✓    |
| 3-4      | 1.5 mmol/100 mL H <sub>2</sub> O | 0.5 mmol / 100 mL Hexane/DCM          | 24                | Thick, defect free | ✓    |
| 3-5      | 1.5 mmol/100 mL H <sub>2</sub> O | 0.5 mmol / 100 mL Hexane/DCM          | 48                | Thick, defect free | ✓    |
| 3-6      | 1.5 mmol/100 mL H <sub>2</sub> O | 0.5 mmol / 100 mL Hexane/DCM          | 72                | Thick, defect free | ✓    |
| 3-7      | 1.5 mmol/100 mL H <sub>2</sub> O | 0.5 mmol / 100 mL Hexane/DCM(3/2)     | 72                | Thick, defect free | ✓    |

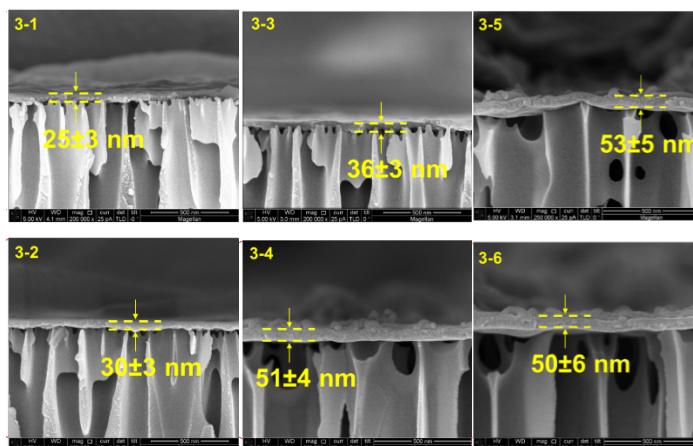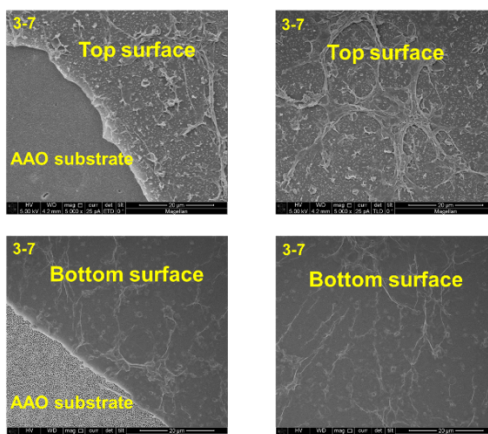

**Fig. S3. Fabrication process, reaction conditions, and the results of the freestanding CON films via water and hexane/dichloromethane (4/1) system.** Photo credits: Jiangtao Liu.

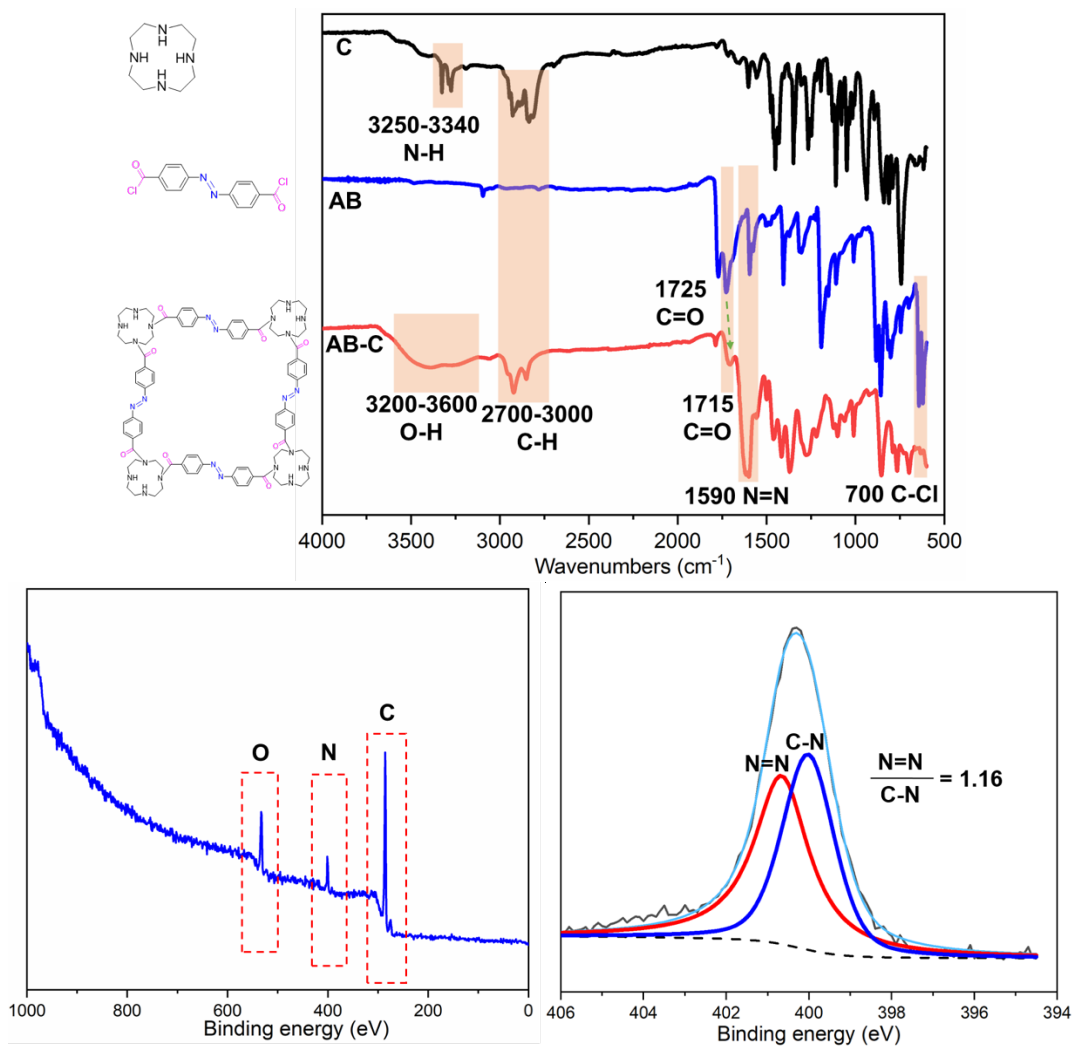

**Fig. S4.** ATR-FTIR spectra of the monomers and free-standing CON films. Note: 1,4,7,10-tetraazacyclododecane (cyclen, C), azobenzene-4,4'-dicarbonyl dichloride (AB), and covalent organic networks (AB-C). XPS spectra and  $\text{N}_{1s}$  analysis of the freestanding *trans*-CON film, the  $\text{N}_{1s}$  peak was deconvoluted into two peaks at 400.5 eV (N=N from azobenzene units) and 399.8 eV (C-N from cyclen units).

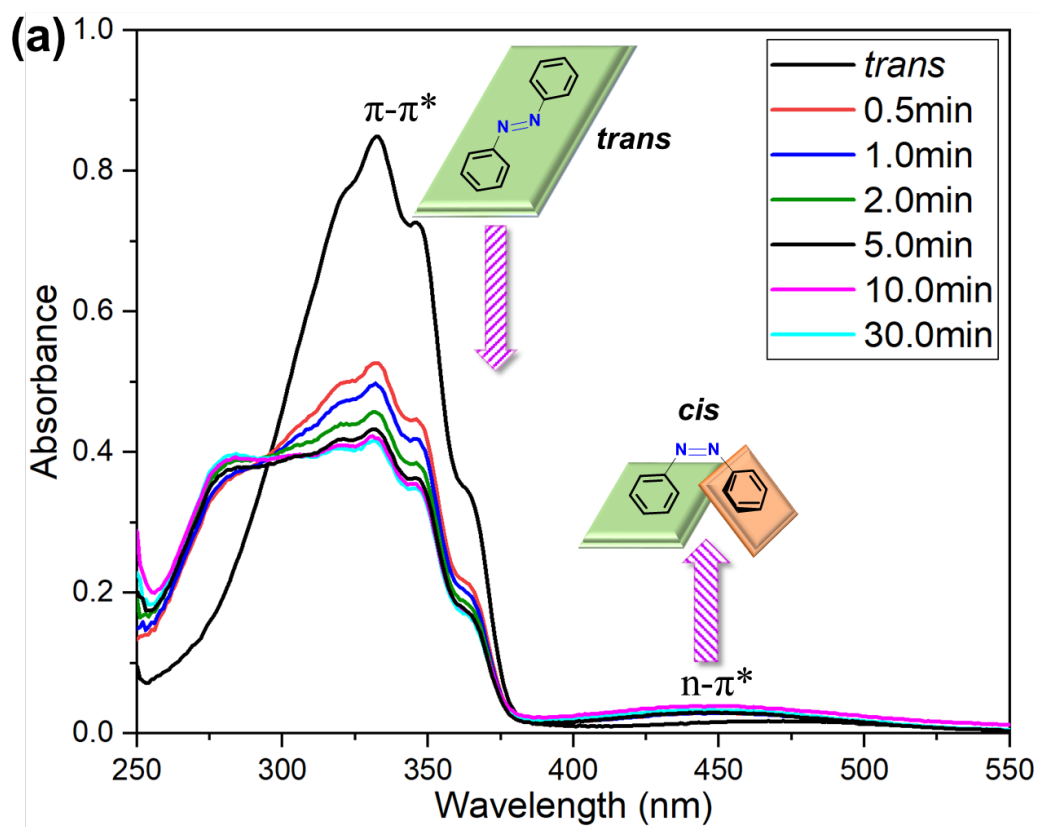

**Fig. S5.** UV-visible spectra of pure azobenene-4,4'-dicarbonyl dichloride *trans*-to-*cis* photoisomerization.

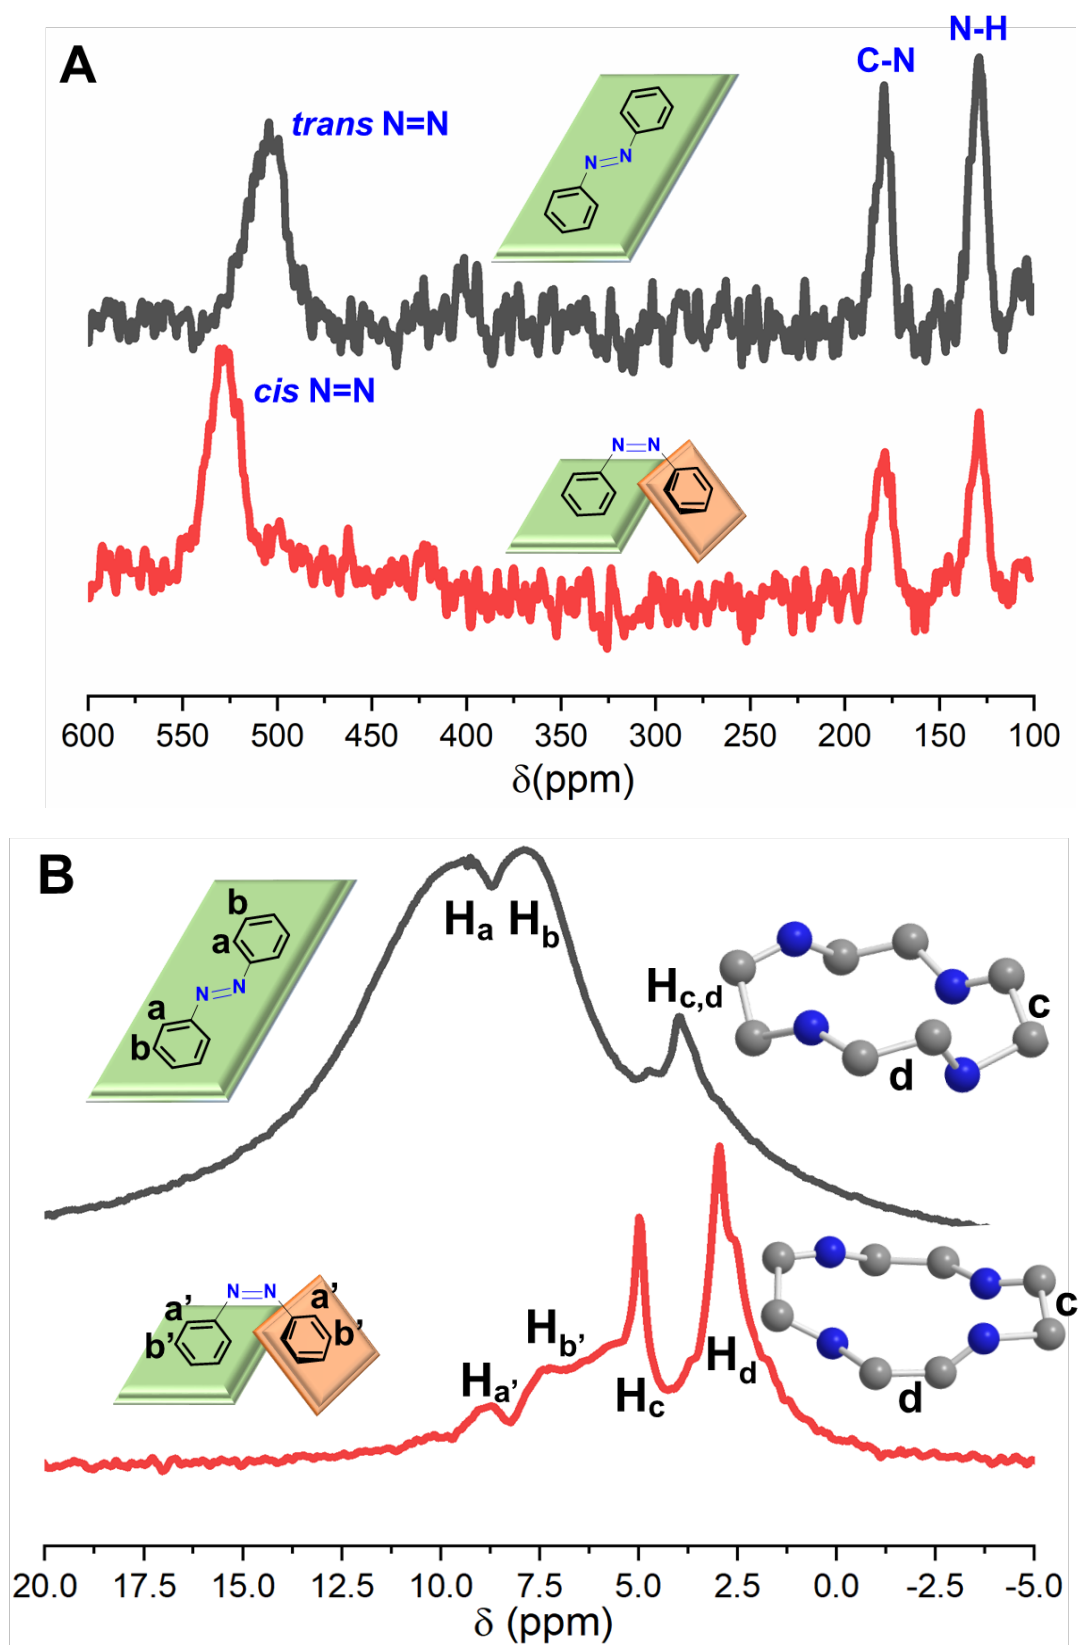

Fig. S6. (A)  $^{15}\text{N}$  NMR and (B)  $^1\text{H}$  NMR spectra of the freestanding *trans*-CON and *cis*-CON film.

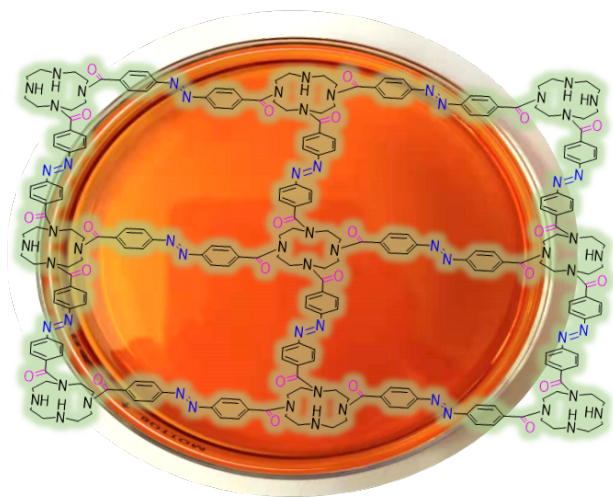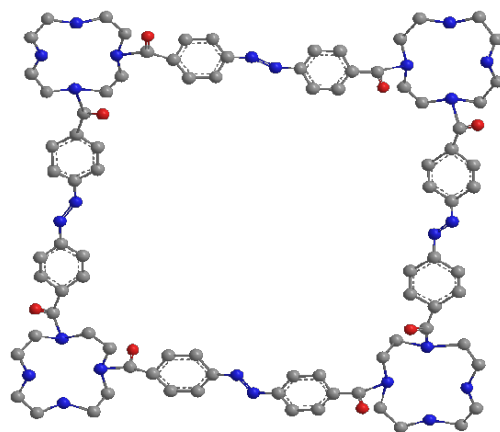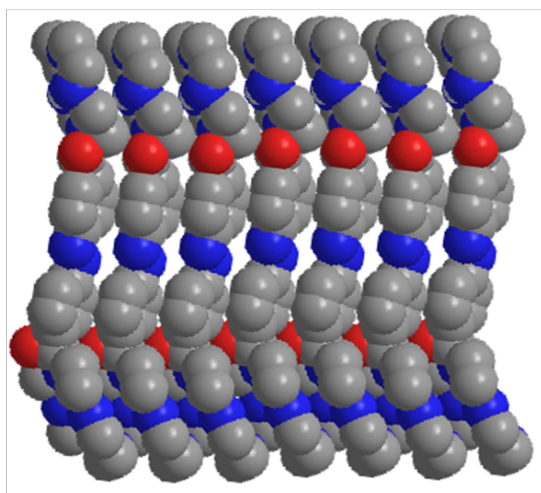

Side view

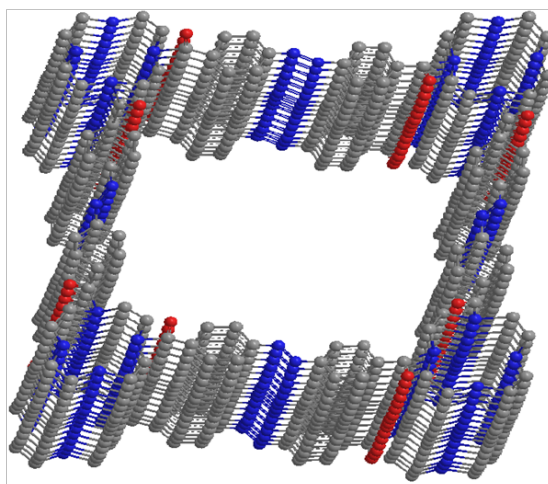

Top view

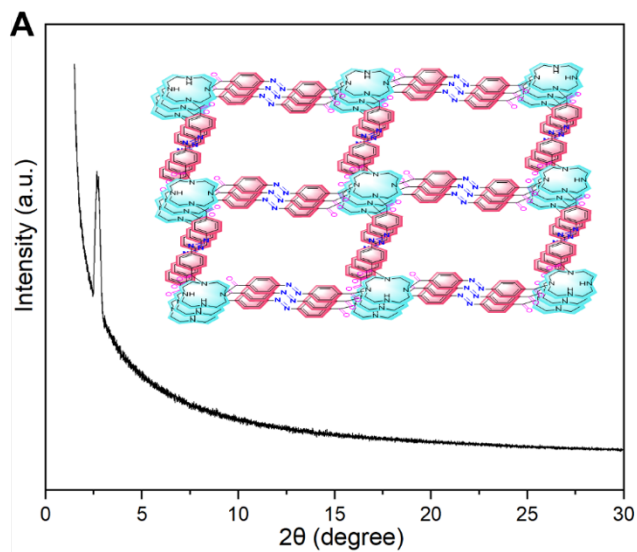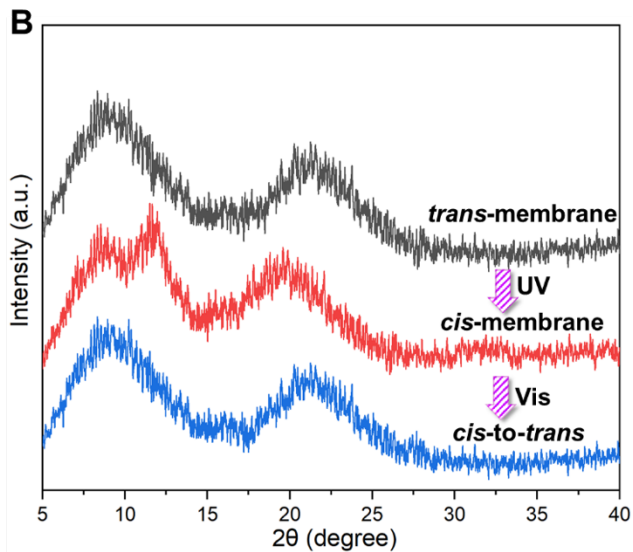

Fig. S7. (A) GID and (B) XRD spectra of the freestanding *trans*-CON and *cis*-CON film. Photo credit: Jiangtao Liu.



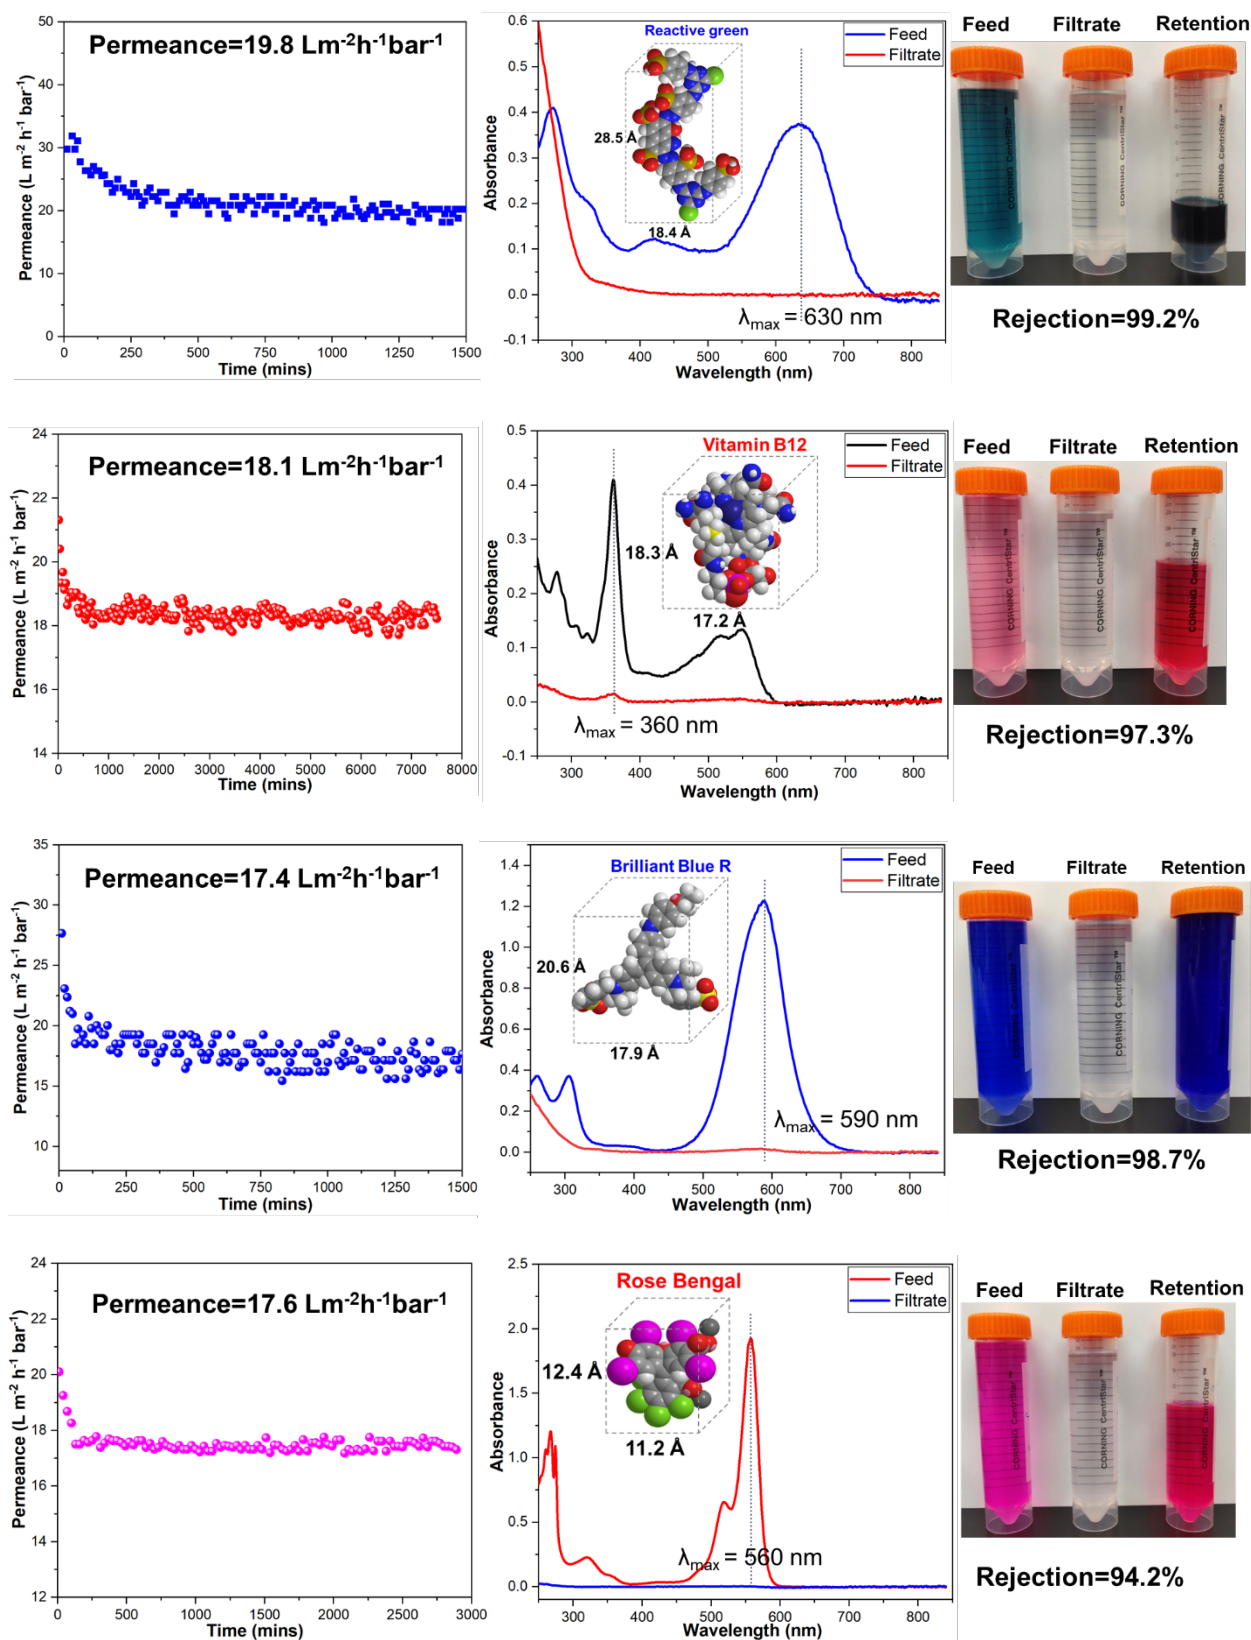

**Fig. S8.** Long-term permeance and UV spectra of dyes in methanol before and after filtration through the *trans*-CON membranes. (Inset) Photograph of the feed, filtrate, and retention of dye solution. Photo credits: Jiangtao Liu.

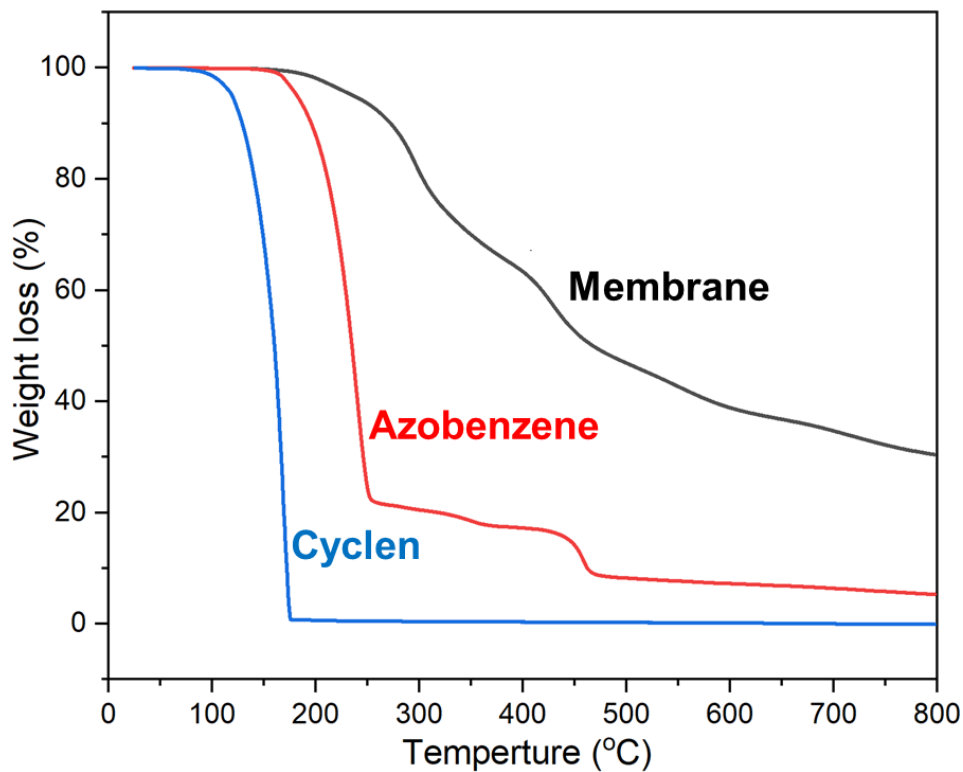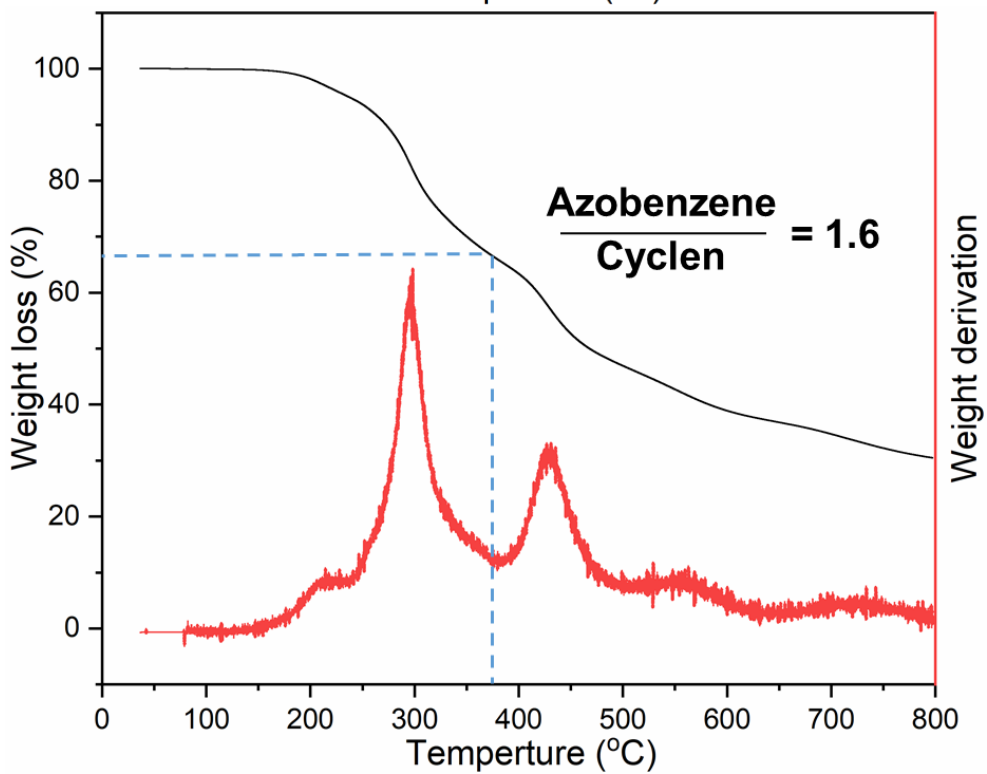

Fig. S9. TGA curves of monomers and CON membranes.

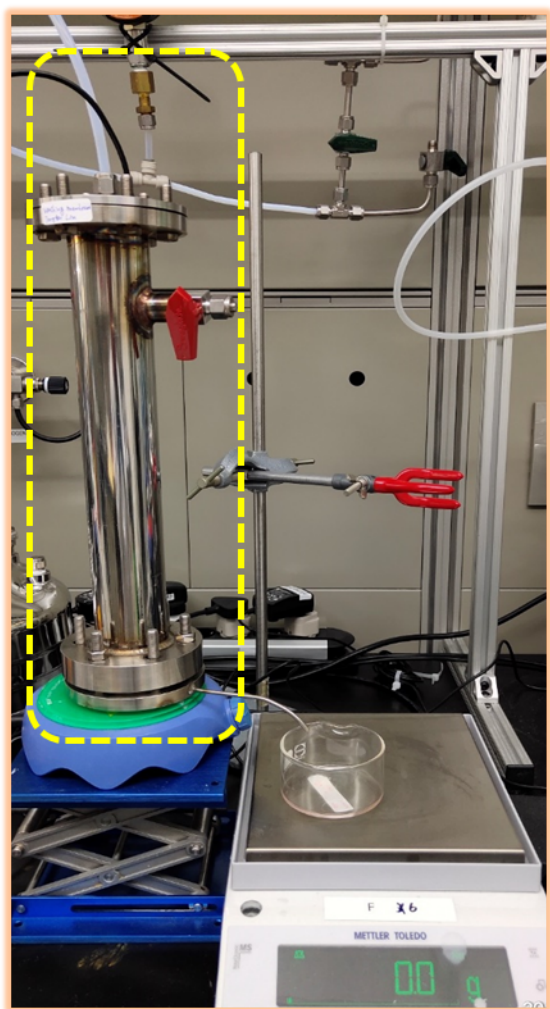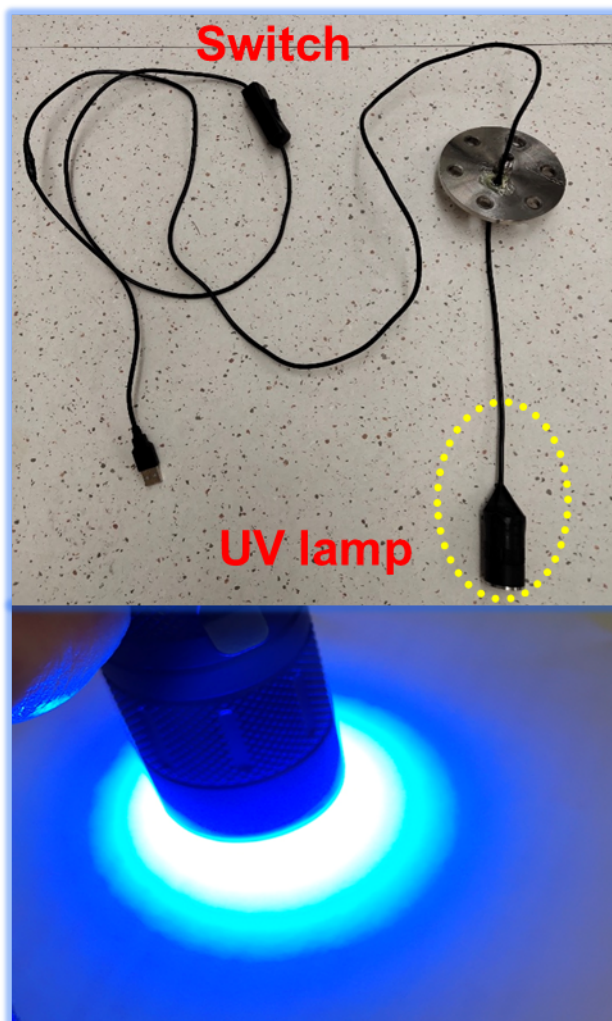

**Fig. S10. Permeation cell equipped with UV lamp.** Photo credits: Jiangtao Liu.

**Table S1. Performance comparison between various organic solvent nanofiltration membranes.**

| Membrane/Substrate             | Permeance (L m <sup>-2</sup> h <sup>-1</sup> MPa <sup>-1</sup> ) | Dye (g/mol)            | Rejection (%) | References   |
|--------------------------------|------------------------------------------------------------------|------------------------|---------------|--------------|
| Freestanding <i>trans</i> -CON | 22.6 (Methanol)                                                  | Indigo carmine (466)   | 49.3          | This work    |
| Freestanding <i>cis</i> -CON   | 19.3 (Methanol)                                                  | Indigo carmine (466)   | 94.7          | This work    |
| Freestanding <i>trans</i> -CON | 17.4 (Methanol)                                                  | Brilliant Blue R (826) | 98.7          | This work    |
| Freestanding PAR-BHPF          | 4.4 (Methanol)                                                   | Brilliant Blue R (826) | 99.7          | (2016) [72]  |
| PAR-BHPF/PI                    | 8.0 (Methanol)                                                   | Brilliant Blue R (826) | 98.0          | (2016) [72]  |
| PAR-TTSBI/PI                   | 6.0 (Methanol)                                                   | Brilliant Blue R (826) | 99.9          | (2016) [72]  |
| PAR-DHAQ/PI                    | 0.6 (Methanol)                                                   | Brilliant Blue R (826) | 100.0         | (2016) [72]  |
| PAR-RES/PI                     | 0.6 (Methanol)                                                   | Brilliant Blue R (826) | 99.8          | (2016) [72]  |
| DuraMem DM150                  | 0.48 (Methanol)                                                  | Acid fuchsin (585)     | 100.0         | (2015) [6: ] |
| PA/Cross-linked P84            | 12.6 (Methanol)                                                  | Acid fuchsin (585)     | 99.9          | (2015) [6: ] |
| PEI-sPPSU                      | 100 (Ethanol)                                                    | Methyl Orange (327)    | 66.8          | (2018) [73]  |
| MWCNTs-COOH/P84                | 96 (Ethanol)                                                     | Rose Bengal (1017)     | 85.0          | (2017) [74]  |
| PEI-DBX/PBI                    | 45 (Ethanol)                                                     | Tetracycline (444)     | 99.0          | (2018) [75]  |
| MPF-50                         | 42 (Ethanol)                                                     | Raffinose (504)        | 41.0          | (2005) [76]  |
| Cross-linked PBI               | 37 (Ethanol)                                                     | Rose Bengal (1017)     | 100           | (2014) [77]  |
| MWCNTs-NH <sub>2</sub> /P84    | 33 (Ethanol)                                                     | Eosin Y (648)          | 98.1          | (2018) [78]  |
| TPP/GO/HPEI/PSS                | 31 (Ethanol)                                                     | Rose Bengal (1017)     | 97.0          | (2017) [79]  |
| PA/crosslinking PI             | 27 (Ethanol)                                                     | Rose Bengal (1017)     | 100           | (2015) [7: ] |
| PVDF-g-PS20                    | 25 (Ethanol)                                                     | Rose Bengal (1017)     | 91.2          | (2017) [7; ] |
| STARMEM™ 122                   | 24.1 (Ethanol)                                                   | Sudan black (456)      | 94.1          | (2010) [82]  |
| PAN-Pebax/GO                   | 19 (Ethanol)                                                     | Brilliant Blue G (854) | 95.0          | (2017) [83]  |
| PI/POSS                        | 12.6 (Ethanol)                                                   | Rose Bengal (1017)     | 99.0          | (2017) [84]  |
| PI                             | 11.0 (Ethanol)                                                   | Methyl Orange (327)    | 95.0          | (2017) [85]  |
| PDA/PI                         | 9.1 (Ethanol)                                                    | Methyl Blue (800)      | 99.0          | (2017) [86]  |
| COF-LZU1/AAO                   | 53.4 (Ethanol)                                                   | Congo Red (697)        | 98.6          | (2018) [87]  |
| PA-COFs/PI                     | 79.8 (Ethanol)                                                   | Rhodamine B (479)      | 99.4          | (2019) [88]  |
| TpPa-1/PAN                     | 41.8 (Ethanol)                                                   | Congo Red (697)        | 99.0          | (2019) [89]  |
| TpPa/PSf                       | 50.0 (Ethanol)                                                   | Congo Red (697)        | 99.5          | (2018) [8: ] |
| TpPa/PVDF                      | 60.0 (Ethanol)                                                   | Congo Red (697)        | 98.72         | (2019) [8; ] |
| TpBD/PSf                       | 33.6 (Ethanol)                                                   | Congo Red (697)        | 99.7          | (2020) [92]  |
| TpBD-Me/PSf                    | 62.2 (Ethanol)                                                   | Congo Red (697)        | 99.2          | (2020) [92]  |

**Table S2. Solvent properties: viscosity, relative polarity, kinetic diameter, and total Hansen solubility parameter.**

| Solvents          | Viscosity at 25°C (mPa S) <sup>71</sup> | Relative polarity <sup>92,93</sup> | Kinetic diameter (nm) <sup>1</sup> | Total Hansen solubility parameter (MPa <sup>1/2</sup> ) <sup>1</sup> |
|-------------------|-----------------------------------------|------------------------------------|------------------------------------|----------------------------------------------------------------------|
| Acetonitrile      | 0.342                                   | 0.460                              | 0.51                               | 24.4                                                                 |
| Acetone           | 0.310                                   | 0.355                              | 0.47                               | 20.1                                                                 |
| Methanol          | 0.539                                   | 0.762                              | 0.38                               | 29.7                                                                 |
| Water             | 0.916                                   | 1.000                              | 0.26                               | 47.8                                                                 |
| Ethanol           | 1.081                                   | 0.654                              | 0.44                               | 26.6                                                                 |
| Isopropanol       | 2.058                                   | 0.546                              | 0.47                               | 24.6                                                                 |
| Butanol           | 2.573                                   | 0.586                              | 0.50                               | 23.1                                                                 |
| Dimethylformamide | 0.816                                   | 0.386                              | 0.55                               | 24.8                                                                 |
| p-Xylene          | 0.710                                   | 0.074                              | 0.59                               | 27.9                                                                 |
| Toluene           | 0.555                                   | 0.099                              | 0.58                               | 18.2                                                                 |
| Cyclohexane       | 0.908                                   | 0.006                              | 0.60                               | 16.8                                                                 |
| Hexane            | 0.294                                   | 0.009                              | 0.51                               | 14.9                                                                 |

**Table S3. Permeances of organic solvents through the self-standing *trans*- and *cis*-CON membranes.**

| Solvents          | Permeance (L m <sup>-2</sup> h <sup>-1</sup> bar <sup>-1</sup> ) |                 |
|-------------------|------------------------------------------------------------------|-----------------|
|                   | <i>trans</i> -CON                                                | <i>cis</i> -CON |
| Acetonitrile      | 56.7±1.8                                                         | 51.2±1.6        |
| Acetone           | 48.2±1.3                                                         | 45.7±1.4        |
| Methanol          | 31.6±0.8                                                         | 30.2±0.5        |
| Water             | 22.1±0.4                                                         | 20.4±0.2        |
| Ethanol           | 12.4±0.6                                                         | 12.6±0.5        |
| Isopropanol       | 6.8±0.5                                                          | 6.4±0.3         |
| Dimethylformamide | 4.3±0.4                                                          | 4.5±0.3         |
| p-Xylene          | 8.6±0.5                                                          | 8.2±0.5         |
| Toluene           | 10.2±0.7                                                         | 12.4±0.6        |
| Cyclohexane       | 15.8±0.8                                                         | 14.3±0.7        |
| Hexane            | 46.5±2.2                                                         | 43.1±1.4        |

**Table S4. The chemical structures, molar weights and dimensional parameters of various dyes.**

| Dyes                   | M <sub>w</sub><br>(g/mol) | Chemical structure                                                                  | 3D molecular structure                                                               | Dimension<br>(Å)<br>(L <sub>1</sub> × L <sub>2</sub> ,<br>L <sub>1</sub> is the<br>long end<br>and L <sub>2</sub> is<br>the short<br>end) |
|------------------------|---------------------------|-------------------------------------------------------------------------------------|--------------------------------------------------------------------------------------|-------------------------------------------------------------------------------------------------------------------------------------------|
| Methyl Orange (MO)     | 327.3                     | 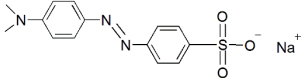   |    | 14.6 × 5.2                                                                                                                                |
| Indigo Carmine (IC)    | 466.4                     |    |    | 15.3 × 7.8                                                                                                                                |
| Rose Bengal (RB)       | 1017.6                    |    |    | 12.4 × 11.2                                                                                                                               |
| Vitamin B12 (VB)       | 1355.4                    |   |   | 18.3 × 17.2                                                                                                                               |
| Brilliant Blue R (BBR) | 825.9                     |  |  | 20.6 × 17.9                                                                                                                               |
| Reactive Green (RG)    | 1418.9                    |  |  | 28.5 × 18.4                                                                                                                               |

## REFERENCES AND NOTES

1. F. D. Jochum, P. Theato, Temperature- and light-responsive smart polymer materials. *Chem. Soc. Rev.* **42**, 7468–7483 (2013).
2. S. Yagai, A. Kitamura, Recent advances in photoresponsive supramolecular self-assemblies. *Chem. Soc. Rev.* **37**, 1520–1529 (2008).
3. Y. Zhao, T. Ikeda, *Smart Light-Responsive Materials: Azobenzene Containing Polymers and Liquid Crystals* (John Wiley & Sons, 2009).
4. A. H. Gelebart, D. J. Mulder, M. Varga, A. Konya, G. Vantomme, E. W. Meijer, R. L. B. Selinger, D. J. Broer, Making waves in a photoactive polymer film. *Nature* **546**, 632–636 (2017).
5. G. S. Hartley, The *cis*-form of azobenzene. *Nature* **140**, 281 (1937).
6. G. S. Kumar, D. C. Neckers, Photochemistry of azobenzene-containing polymers. *Chem. Rev.* **89**, 1915–1925 (1989).
7. W. R. Browne, B. L. Feringa, Making molecular machines work. *Nat. Nanotechnol.* **1**, 25–35 (2006).
8. S. Li, N. Prasetya, B. P. Ladewig, Investigation of Azo-COP-2 as a photoresponsive low-energy CO<sub>2</sub> adsorbent and porous filler in mixed matrix membranes for CO<sub>2</sub>/N<sub>2</sub> separation. *Ind. Eng. Chem. Res.* **58**, 9959–9969 (2019).
9. Y. Yu, Materials science: A light-fuelled wave machine. *Nature* **546**, 604–607 (2017).
10. T. Muraoka, K. Kinbara, T. Aida, Mechanical twisting of a guest by a photoresponsive host. *Nature* **440**, 512–515 (2006).
11. J. Henzl, M. Mehlhorn, H. Gawronski, K.-H. Rieder, K. Morgenstern, Reversible *cis*–*trans* isomerization of a single azobenzene molecule. *Angew. Chem. Int. Ed. Engl.* **45**, 603–606 (2006).



12. H. M. D. Bandara, S. C. Burdette, Photoisomerization in different classes of azobenzene. *Chem. Soc. Rev.* **41**, 1809–1825 (2012).
13. J. Park, D. Yuan, K. T. Pham, J.-R. Li, A. Yakovenko, H.-C. Zhou, Reversible alteration of CO<sub>2</sub> adsorption upon photochemical or thermal treatment in a metal–organic framework. *J. Am. Chem. Soc.* **134**, 99–102 (2012).
14. N. Liu, Z. Chen, D. R. Dunphy, Y. B. Jiang, R. A. Assink, C. J. Brinker, Photoresponsive nanocomposite formed by self-assembly of an azobenzene-modified silane. *Angew. Chem. Int. Ed.* **42**, 1731–1734 (2003).
15. N. Yanai, T. Uemura, M. Inoue, R. Matsuda, T. Fukushima, M. Tsujimoto, S. Isoda, S. Kitagawa, Guest-to-host transmission of structural changes for stimuli-responsive adsorption property. *J. Am. Chem. Soc.* **134**, 4501–4504 (2012).
16. A. P. Côté, A. I. Benin, N. W. Ockwig, M. O'Keeffe, A. J. Matzger, O. M. Yaghi, Porous, crystalline, covalent organic frameworks. *Science* **310**, 1166–1170 (2005).
17. D. Beaudoin, T. Maris, J. D. Wuest, Constructing monocrystalline covalent organic networks by polymerization. *Nat. Chem.* **5**, 830–834 (2013).
18. X. Feng, X. Ding, D. Jiang, Covalent organic frameworks. *Chem. Soc. Rev.* **41**, 6010–6022 (2012).
19. J. L. Segura, M. J. Mancheño, F. Zamora, Covalent organic frameworks based on Schiff-base chemistry: Synthesis, properties and potential applications. *Chem. Soc. Rev.* **45**, 5635–5671 (2016).
20. S.-Y. Ding, W. Wang, Covalent organic frameworks (COFs): From design to applications. *Chem. Soc. Rev.* **42**, 548–568 (2013).
21. P. Manchanda, S. Chisca, L. Upadhyaya, V.-E. Musteata, M. Carrington, S. P. Nunes, Diffusion-induced in situ growth of covalent organic frameworks for composite membranes. *J. Mater. Chem. A* **7**, 25802–25807 (2019).

22. F. Hiroyasu, O. M. Yaghi, Storage of hydrogen, methane, and carbon dioxide in highly porous covalent organic frameworks for clean energy applications. *J. Am. Chem. Soc.* **131**, 8875–8883 (2009).
23. N. Huang, X. Chen, R. Krishna, D. Jiang, Two-dimensional covalent organic frameworks for carbon dioxide capture through channel-wall functionalization. *Angew. Chem. Int. Ed.* **54**, 2986–2990 (2015).
24. H.-L. Qian, C.-X. Yang, X.-P. Yan, Bottom-up synthesis of chiral covalent organic frameworks and their bound capillaries for chiral separation. *Nat. Commun.* **7**, 12104 (2016).
25. F. Xu, H. Xu, X. Chen, D. Wu, Y. Wu, H. Liu, C. Gu, R. Fu, D. Jiang, Radical covalent organic frameworks: A general strategy to immobilize open-accessible polyradicals for high-performance capacitive energy storage. *Angew. Chem. Int. Ed.* **54**, 6814–6818 (2015).
26. C. R. DeBlase, K. E. Silberstein, T.-T. Truong, H. D. Abruña, W. R. Dichtel,  $\beta$ -Ketoenamine-linked covalent organic frameworks capable of pseudocapacitive energy storage. *J. Am. Chem. Soc.* **135**, 16821–16824 (2013).
27. N. Keller, D. Bessinger, S. Reuter, M. Calik, L. Ascherl, F. C. Hanusch, F. Auras, T. Bein, Oligothiophene-bridged conjugated covalent organic frameworks. *J. Am. Chem. Soc.* **139**, 8194–8199 (2017).
28. S. Dalapati, S. Jin, J. Gao, Y. Xu, A. Nagai, D. Jiang, An azine-linked covalent organic framework. *J. Am. Chem. Soc.* **135**, 17310–17313 (2013).
29. Q. Fang, J. Wang, S. Gu, R. B. Kaspar, Z. Zhuang, J. Zheng, H. Guo, S. Qiu, Y. Yan, 3D porous crystalline polyimide covalent organic frameworks for drug delivery. *J. Am. Chem. Soc.* **137**, 8352–8355 (2015).
30. S. Lin, C. S. Diercks, Y.-B. Zhang, N. Kornienko, E. M. Nichols, Y. Zhao, A. R. Paris, D. Kim, P. Yang, O. M. Yaghi, C. J. Chang, Covalent organic frameworks comprising cobalt porphyrins for catalytic CO<sub>2</sub> reduction in water. *Science* **349**, 1208–1213 (2015).

31. V. S. Vyas, F. Haase, L. Stegbauer, G. Savasci, F. Podjaski, C. Ochsenfeld, B. V. Lotsch, A tunable azine covalent organic framework platform for visible light-induced hydrogen generation. *Nat. Commun.* **6**, 8508 (2015).
32. P. Pachfule, A. Acharjya, J. Roeser, T. Langenhahn, M. Schwarze, R. Schomäcker, A. Thomas, J. Schmidt, Diacetylene functionalized covalent organic framework (COF) for photocatalytic hydrogen generation. *J. Am. Chem. Soc.* **140**, 1423–1427 (2018).
33. J. Zhang, L. Wang, N. Li, J. Liu, W. Zhang, Z. Zhang, N. Zhou, X. Zhu, A novel azobenzene covalent organic framework. *CrstEngComm* **16**, 6547–6551 (2014).
34. C. Liu, W. Zhang, Q. Zeng, S. Lei, A photoresponsive surface covalent organic framework: Surface-confined synthesis, isomerization, and controlled guest capture and release. *Chem. A Eur. J.* **22**, 6768–6773 (2016).
35. Z. B. Wang, A. Knebel, S. Grosjean, D. Wagner, S. Bräse, C. Wöll, J. Caro, L. Heinke, Tunable molecular separation by nanoporous membranes. *Nat. Commun.* **7**, 13872 (2016).
36. G. Das, T. Prakasam, M. A. Addicoat, S. K. Sharma, F. Ravaux, R. Mathew, M. Baias, R. Jagannathan, M. A. Olson, A. Trabolsi, Azobenzene-equipped covalent organic framework: Light-operated reservoir. *J. Am. Chem. Soc.* **141**, 19078–19087 (2019).
37. M. Meyer, V. Dahaoui-Gindrey, C. Lecomte, R. Guillard, Conformations and coordination schemes of carboxylate and carbamoyl derivatives of the tetraazamacrocycles cyclen and cyclam, and the relation to their protonation states. *Coord. Chem. Rev.* **178–180**, 1313–1405 (1998).
38. H. Sell, A. Gehl, D. Plaul, F. D. Sönnichsen, C. Schütt, F. Köhler, K. Steinborn, R. Herges, Towards a light driven molecular assembler. *Commun. Chem.* **2**, 62 (2019).
39. S. Shinkai, T. Nakaji, Y. Nishida, T. Ogawa, O. Manabe, Photoresponsive crown ethers. 1. Cis-trans isomerism of azobenzene as a tool to enforce conformational changes of crown ethers and polymers. *J. Am. Chem. Soc.* **102**, 5860–5865 (1980).

40. B. Bosnich, C. K. Poon, M. Tobe, Complexes of cobalt (III) with a cyclic tetradentate secondary amine. *Inorg. Chem.* **4**, 1102–1108 (1965).
41. T. Asano, T. Okada, S. Shinkai, K. Shigematsu, Y. Kusano, O. Manabe, Temperature and pressure dependences of thermal cis-to-trans isomerization of azobenzenes which evidence an inversion mechanism. *J. Am. Chem. Soc.* **103**, 5161–5165 (1981).
42. H. Rau, Further evidence for rotation in the  $\pi$ ,  $\pi^*$  and inversion in the n,  $\pi^*$  photoisomerization of azobenzenes. *J. Photochem.* **26**, 221–225 (1984).
43. H. Rau, E. Lueddecke, On the rotation-inversion controversy on photoisomerization of azobenzenes. Experimental proof of inversion. *J. Am. Chem. Soc.* **104**, 1616–1620 (1982).
44. J. G. Cezar, J. R. M. Carvalho, K. Q. Ferreira, Kinetic and thermodynamic studies of aquation reactions in  $[\text{RuL}_2(\text{mac})]^{q+}$  complexes: [mac= 1,4,8,11-tetraazacyclotetradecane (cyclam) or 1,4,7,10-tetraazacyclododecane (cyclen); and L=  $\text{Cl}^-$ ,  $\text{OH}^-$ ,  $\text{OH}_2$ ]. *Transition Met. Chem. (London)* **44**, 253–261 (2019).
45. R. J. Petersen, Composite reverse osmosis and nanofiltration membranes. *J. Membr. Sci.* **83**, 81–150 (1993).
46. R. D. Curtis, J. W. Hilborn, G. Wu, M. D. Lumsden, R. E. Wasylshen, J. A. Pincock, A nitrogen-15 NMR study of cis-azobenzene in the solid state. *J. Phys. Chem.* **97**, 1856–1861 (1993).
47. A. Lyčka, Carbon-13 and nitrogen-15 NMR spectra of cis- and trans-azobenzene, 4-monosubstituted and 4, 4'-disubstituted trans-azobenzenes. *Collect. Czech. Chem. Commun.* **47**, 1112–1120 (1982).
48. S. Karan, Z. Jiang, A. G. Livingston, Sub-10 nm polyamide nanofilms with ultrafast solvent transport for molecular separation. *Science* **348**, 1347–1351 (2015).

49. R. P. Schwarzenbach, B. I. Escher, K. Fenner, T. B. Hofstetter, C. A. Johnson, U. von Gunten, B. Wehrli, The challenge of micropollutants in aquatic systems. *Science* **313**, 1072–1077 (2006).
50. M. F. Jimenez-Solomon, Q. Song, K. E. Jelfs, M. Munoz-Ibanez, A. G. Livingston, Polymer nanofilms with enhanced microporosity by interfacial polymerization. *Nat. Mater.* **15**, 760–767 (2016).
51. Y. Feng, M. Weber, C. Maletzko, T.-S. Chung, Facile fabrication of sulfonated polyphenylenesulfone (sPPSU) membranes with high separation performance for organic solvent nanofiltration. *J. Membr. Sci.* **549**, 550–558 (2018).
52. M. H. D. A. Farahani, D. Hua, T.-S. Chung, Cross-linked mixed matrix membranes consisting of carboxyl-functionalized multi-walled carbon nanotubes and P84 polyimide for organic solvent nanofiltration (OSN). *Sep. Purif. Technol.* **186**, 243–254 (2017).
53. A. A. Tashvigh, T.-S. Chung, Facile fabrication of solvent resistant thin film composite membranes by interfacial crosslinking reaction between polyethylenimine and dibromo-p-xylene on polybenzimidazole substrates. *J. Membr. Sci.* **560**, 115–124 (2018).
54. J. Geens, K. Peeters, B. Van der bruggen, C. Vandecasteele, Polymeric nanofiltration of binary water–alcohol mixtures: Influence of feed composition and membrane properties on permeability and rejection. *J. Membr. Sci.* **255**, 255–264 (2005).
55. D. Y. Xing, S. Y. Chan, T.-S. Chung, The ionic liquid [EMIM]OAc as a solvent to fabricate stable polybenzimidazole membranes for organic solvent nanofiltration. *Green Chem.* **16**, 1383–1392 (2014).
56. M. H. D. A. Farahani, D. Hua, T.-S. Chung, Cross-linked mixed matrix membranes (MMMs) consisting of amine-functionalized multi-walled carbon nanotubes and P84 polyimide for organic solvent nanofiltration (OSN) with enhanced flux. *J. Membr. Sci.* **548**, 319–331 (2018).

57. D. Hua, T.-S. Chung, Polyelectrolyte functionalized lamellar graphene oxide membranes on polypropylene support for organic solvent nanofiltration. *Carbon* **122**, 604–613 (2017).
58. S. Hermans, E. Dom, H. Mariën, G. Koeckelberghs, I. F. J. Vankelecom, Efficient synthesis of interfacially polymerized membranes for solvent resistant nanofiltration. *J. Membr. Sci.* **476**, 356–363 (2015).
59. F. Yuan, Y. Yang, R. Wang, D. Chen, Poly(vinylidene fluoride) grafted polystyrene (PVDF-g-PS) membrane based on in situ polymerization for solvent resistant nanofiltration. *RSC Adv.* **7**, 33201–33207 (2017).
60. S. Darvishmanesh, J. Degreve, B. Van der Bruggen, Mechanisms of solute rejection in solvent resistant nanofiltration: The effect of solvent on solute rejection. *Phys. Chem. Chem. Phys.* **12**, 13333–13342 (2010).
61. J. Aburabie, K.-V. Peinemann, Crosslinked poly(ether block amide) composite membranes for organic solvent nanofiltration applications. *J. Membr. Sci.* **523**, 264–272 (2017).
62. Y. C. Xu, Y. P. Tang, L. F. Liu, Z. H. Guo, L. Shao, Nanocomposite organic solvent nanofiltration membranes by a highly-efficient mussel-inspired co-deposition strategy. *J. Membr. Sci.* **526**, 32–42 (2017).
63. H. Mariën, I. F. J. Vankelecom, Transformation of cross-linked polyimide UF membranes into highly permeable SRNF membranes via solvent annealing. *J. Membr. Sci.* **541**, 205–213 (2017).
64. Y. Xu, F. You, H. Sun, L. Shao, Realizing mussel-inspired polydopamine selective layer with strong solvent resistance in nanofiltration toward sustainable reclamation. *ACS Sustain. Chem. Eng.* **5**, 5520–5528 (2017).
65. H. Fan, J. Gu, H. Meng, A. Knebel, J. Caro. High-flux membranes based on the covalent organic framework COF-LZU1 for selective dye separation by nanofiltration. *Angew. Chem. Int. Ed.* **57**, 4083–4087 (2018).

66. C. Li, S. Li, L. Tian, J. Zhang, B. Su, M. Z. Hu, Covalent organic frameworks (COFs)-incorporated thin film nanocomposite (TFN) membranes for high-flux organic solvent nanofiltration (OSN). *J. Membr. Sci.* **572**, 520–531 (2019).
67. F. Pan, W. Guo, Y. Su, N. A. Khan, H. Yang, Z. Jiang, Direct growth of covalent organic framework nanofiltration membranes on modified porous substrates for dyes separation. *Sep. Purif. Technol.* **215**, 582–589 (2019).
68. R. Wang, X. Shi, A. Xiao, W. Zhou, Y. Wang. Interfacial polymerization of covalent organic frameworks (COFs) on polymeric substrates for molecular separations. *J. Membr. Sci.* **566**, 197–204 (2018).
69. R. Wang, X. Shi, Z. Zhang, A. Xiao, S.-P. Sun, Z. Cui, Y. Wang. Unidirectional diffusion synthesis of covalent organic frameworks (COFs) on polymeric substrates for dye separation. *J. Membr. Sci.* **586**, 274–280 (2019).
70. T. Wang, H. Wu, S. Zhao, W. Zhang, M. Tahir, Z. Wang, J. Wang, Interfacial polymerized and pore-variable covalent organic framework composite membrane for dye separation. *Chem. Eng. J.* **384**, 123347 (2020).
71. A. Buekenhoudt, F. Bisignano, G. De Luca, P. Vandezande, M. Wouters, K. Verhulst, Unravelling the solvent flux behaviour of ceramic nanofiltration and ultrafiltration membranes. *J. Membr. Sci.* **439**, 36–47 (2013).
72. Q. Yang, Y. Su, C. Chi, C. T. Cherian, K. Huang, V. G. Kravets, F. C. Wang, J. C. Zhang, A. Pratt, A. N. Grigorenko, F. Guinea, A. K. Geim, R. R. Nair, Ultrathin graphene-based membrane with precise molecular sieving and ultrafast solvent permeation. *Nat. Mater.* **16**, 1198–1202 (2017).
73. I. M. Smallwood, *Handbook of Organic Solvent Properties* (Butterworth-Heinemann, 2012).
